# Supplementary material for: Efficient genome editing using tRNA promoter-driven CRISPR/Cas9 gRNA in Aspergillus niger
Source: PubMed Central journal article supplement (PMC6108506; doi:10.1371/journal.pone.0202868), 2018-08-24

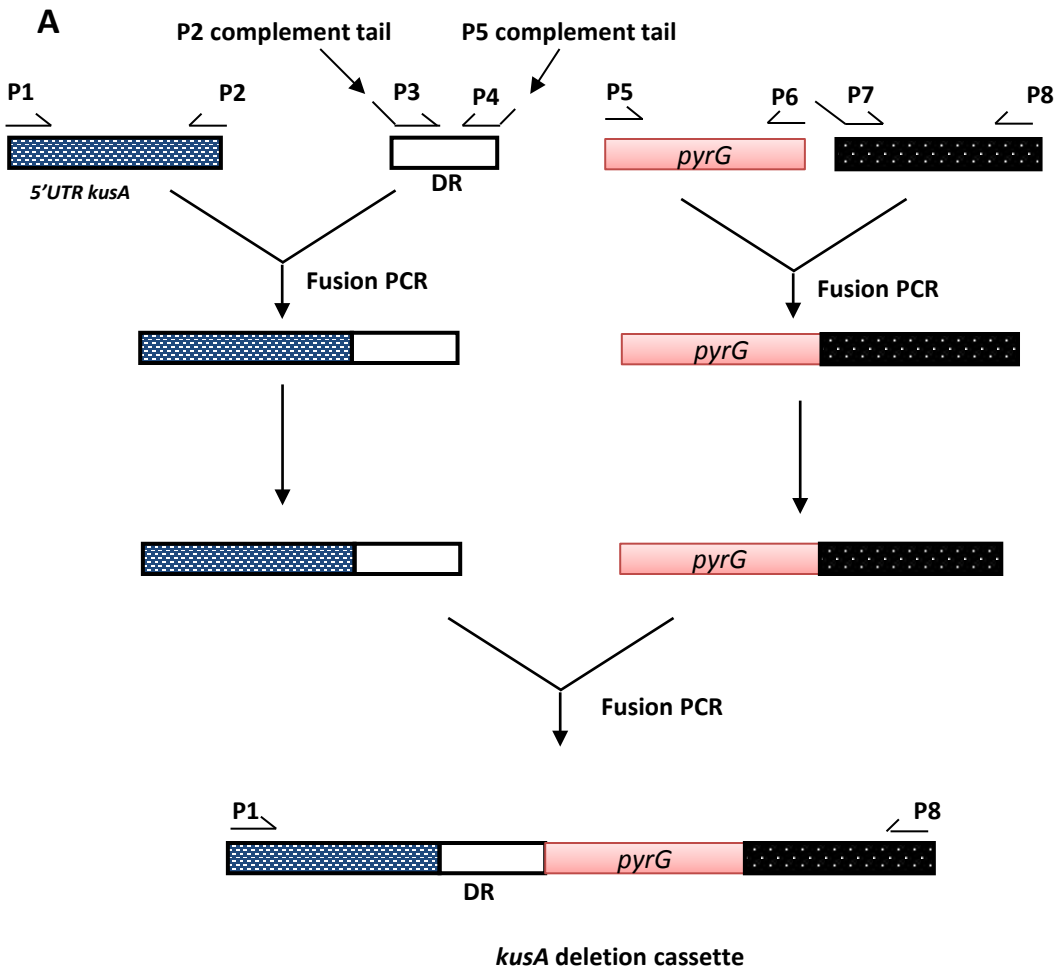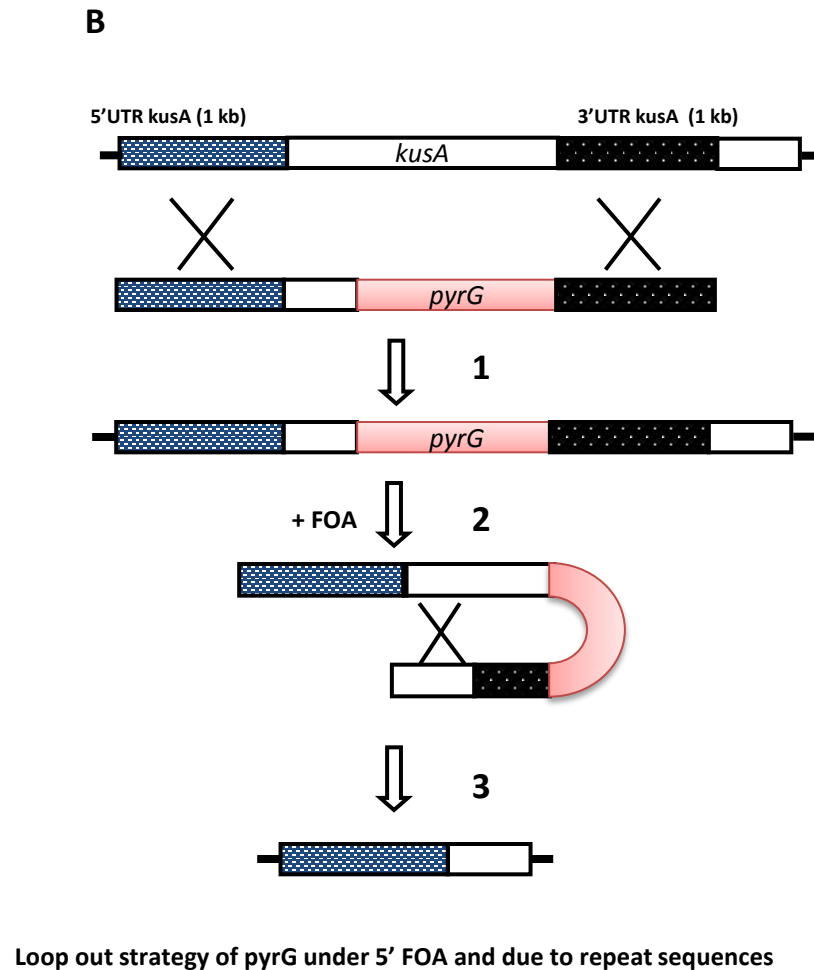

Supplement: pone.0202868.s003.pdf [file pone.0202868.s003.pdf]
