# Supplementary material for: Efficient genome editing using tRNA promoter-driven CRISPR/Cas9 gRNA in Aspergillus niger
Source: PubMed Central journal article supplement (PMC6108506; doi:10.1371/journal.pone.0202868), 2018-08-24

**A***ΔkusA pyrG<sup>+</sup>*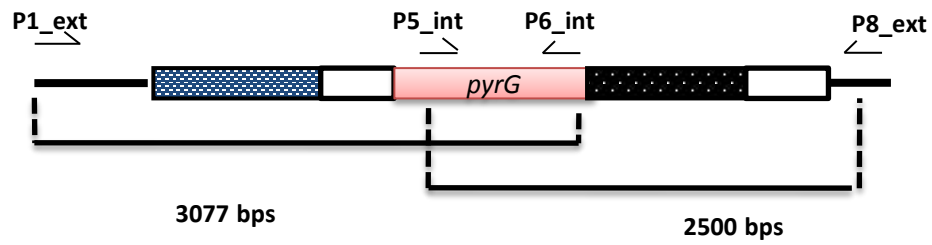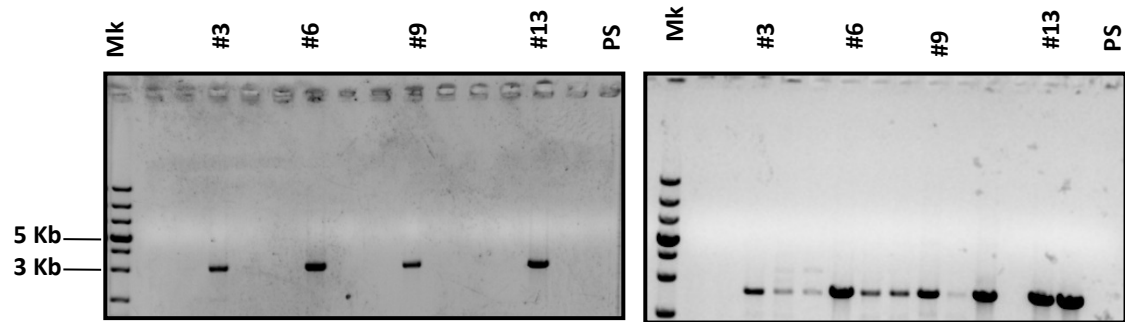

P1\_ext and P6\_int

P5\_int and P8\_ext

**B***ΔkusA ΔpyrG*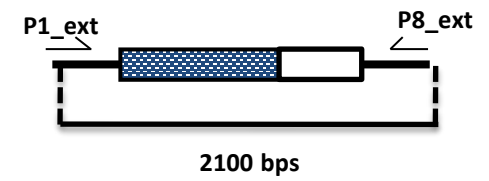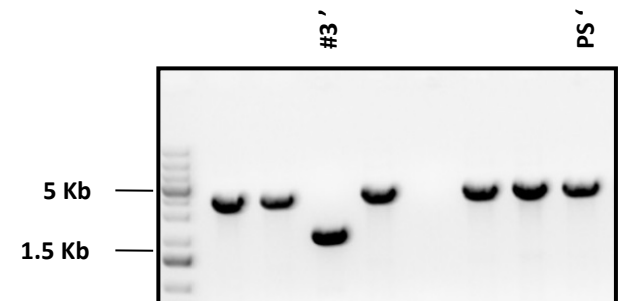

P1\_ext and P8\_ext

**C**

MM + Uridine

CM + Uridine

NRRL2270  
*ΔpyrG*NRRL2270  
*ΔkusAΔpyrG*NRRL2270  
*ΔpyrG*NRRL2270  
*ΔkusAΔpyrG*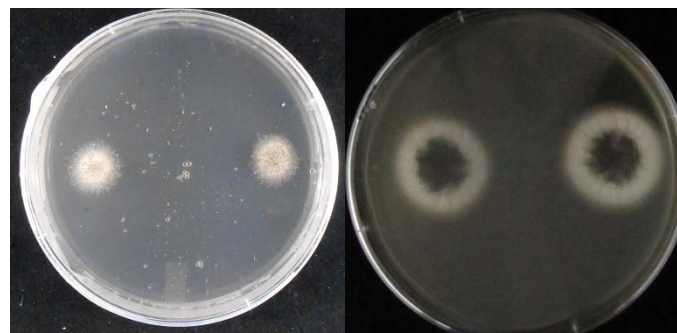

Supplement: pone.0202868.s004.pdf [file pone.0202868.s004.pdf]
