# Supplementary material for: Efficient genome editing using tRNA promoter-driven CRISPR/Cas9 gRNA in Aspergillus niger
Source: PubMed Central journal article supplement (PMC6108506; doi:10.1371/journal.pone.0202868), 2018-08-24
Supplement: pone.0202868.s010.pdf [file pone.0202868.s010.pdf]

CGATGGATGGTTCAAGGGGAACCGTATTTATCGTATGCAGATGGTCACCCGCGGTAGAGGCACTGGGTTCCGCGTCTGCTACTCGGCTATTAGCAGCATGACGGACAACAGTGCTCCGTAATGTTTCATGCC  
AACAAAGGCAGATTTATTGGCCGAGGCTCGTGTAGCCTGTGAGACGGCAATTGGACGTGCGGGTCTGCTACCAACCCGCGATATTACCGTTTTGCAAGCGTTTGTGTTGATCTGGTATGACTCGACACTGGTCCCA  
AGAAGAAAGACGATAAACTGACTCTTGTAGGTAGCTAGGAGATCTGAAGACCGCACTCCGGCCGCTGGACACTGATCGCACTGGCTGTGCGAATCGGTAAGGCTCGGCTTTATCTGGATCCCGAGACGG  
AGACCTTTTTGATCAGCAGATACGGAGGCGCCTCTGGTTTACCATTTGCCTGATGGATTTGACAGCCTCTTCGGCCAGGCATCTGAGCCGCTGATTAGTGTGACGAGCTGCATCCACAGCTTCCCAGCAC  
ATCAATGACTCGGACTTTGATCCGACACGGCCGCCACAGCATCCAACAGGGAGGGTCTGACAGACAGACCTTTGCTTGGTCACCTACCATGCTCAGCGGACGGGCCGCTCTCAACTTTGTTCAACAGC  
ATCGCAAGGTCGACGGGGGATTCCAACCTCCACATCTCTACTTCCGGTACTTCTACATCCCGCTCTCGTACATGCGACCCAGTTGGCCGACGACGAGGCCCGGCACTTCGAACAAGAAGCACTGCGGCTCT  
CCATTTCTGTGACCTGGCACCTCTGCGTACCGCTGGTTACCTGGCACGGCACGAGACCTAATCGCGACAGTCCGACTGGCAGCCGCGGACCGCTTCAATGGCACGGTCAGGCGCCGCGCTCGCCGCGA  
GGGCAACACCGAGCTGCTGCTCTGCTCTCCCGTGTGGAGAAAGCGCAACTCATGCACACCGACCCCGTCCGAGGGCTTCCGTTGGTATGTAACAATCCCTGGTACGCGCTGGCGATGGCCCTCGCAGA  
GTGCTATGTGACAGTGACACTGCCCTGGTGGGTACGCGTGGCCGCTGGTCGAGTCGTCTGACCTGCACTGACGAGGGGACGCTGGGACAATCTCTGGGCGGCCATTGGACAACCTCATGCGGGCATGAAAG  
AGAAGCTGGCGGCCCGCCGCACTCCACCAAGCAGTCTGCCGACCAACTGGAGTCCAGCCACTCCCAACATTCGCGGCGTGCCTCGGCCACAGAGTAGTCATGATGATCGACATGCGCCGGTTGC  
TCTTGGCCGGTGCCACCGGATCCACCCCGCTGCGGATCTGGGGTGCCATCCCTCCTCCAGTATCCACTGGGAGGGCTCTCGCCACCGTGTGGACAACCTTCGCTCTTGGGGTGCTCCGACGACGA  
CGGCGGTGGCGGACGGGATGGATCCGGGGGCGGATATAATGTGGGAGGAGTTGTTTTCGGGATCCGTTCAATGAGATAGCGGGGCGGATACGTTCTTTTCGATATGAACTGGGGAGTTGACCGACCC  
GACGGTGAAGTACACCTGGCGGTAGACAATCAATCCATTTCCGCTATAGTTAAAGGATGGGGATGAGGGCAATTGGTTATATGATCATGTATGATGAGGGGTGTCATAATAGTAGTAAATGGAAGCCAAATCAT  
GTGATTGTAATCGACCGACGGAATTGAGGATATCCGAAATACAGACACCGTGAAGCCATGGTCTTTCTTCGTGAGAACGACGACAGACAGTCCCTGATTACCTGCACAAAGCACTAGAAAATAGCAT  
TCCATCCTCTCTGCTGCTGATATCACTGTCATTCAATGCATAGCCATGAGCTCATCTTAGATCAAGCACGTAATTCATAGCCGAGGTCACAGTGGAGCAAGCAATCCCATCATGCTTTCCCCAG  
GGGCTCCCAACGACTAAATCAAGATATATCTACCGTCCAATAGATGCTCTCGCTTCAAAATCTTTGACAATCCAAGAGGGTCCCATCAAAACCGTCAATAATAGCCGAGATGCATGGTGGAGT  
AATTAGGCAGTATTGCTGGAATGTCGGGGCAGTTCGCGGTGGTATTGGCCGCTGTGATG
